# Supplementary material for: Genomic Characterization and Virulence Potential of Two Fusarium oxysporum Isolates Cultured from the International Space Station
Source: PubMed Central journal article supplement (PMC6426649; doi:10.1128/msystems.00345-18), 2019-03-19

A

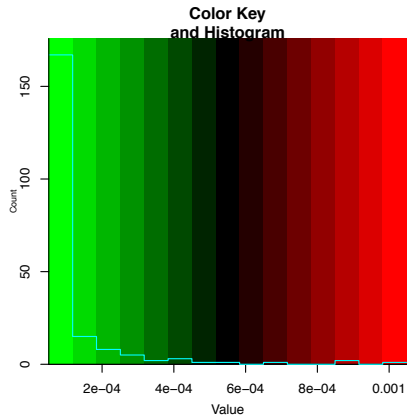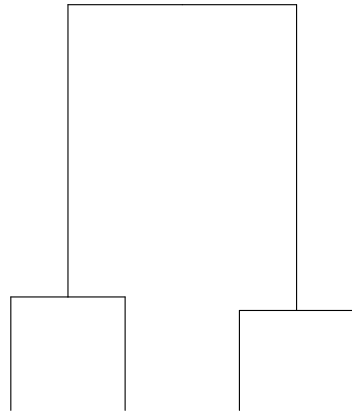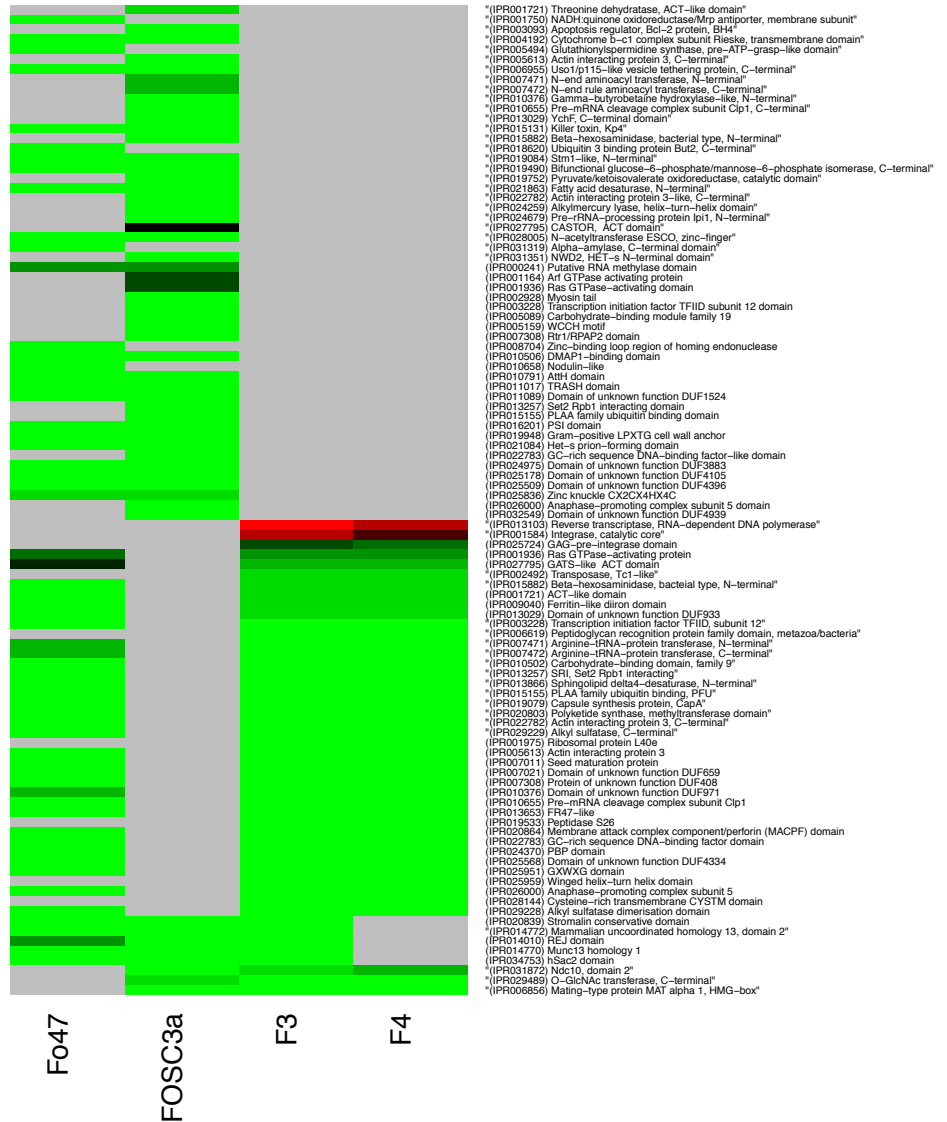

B

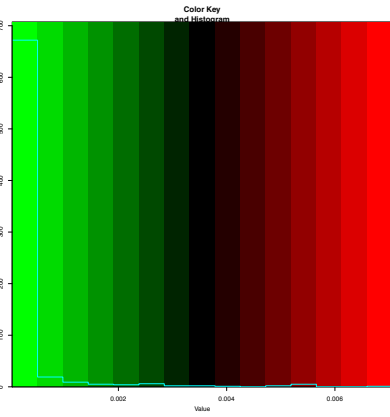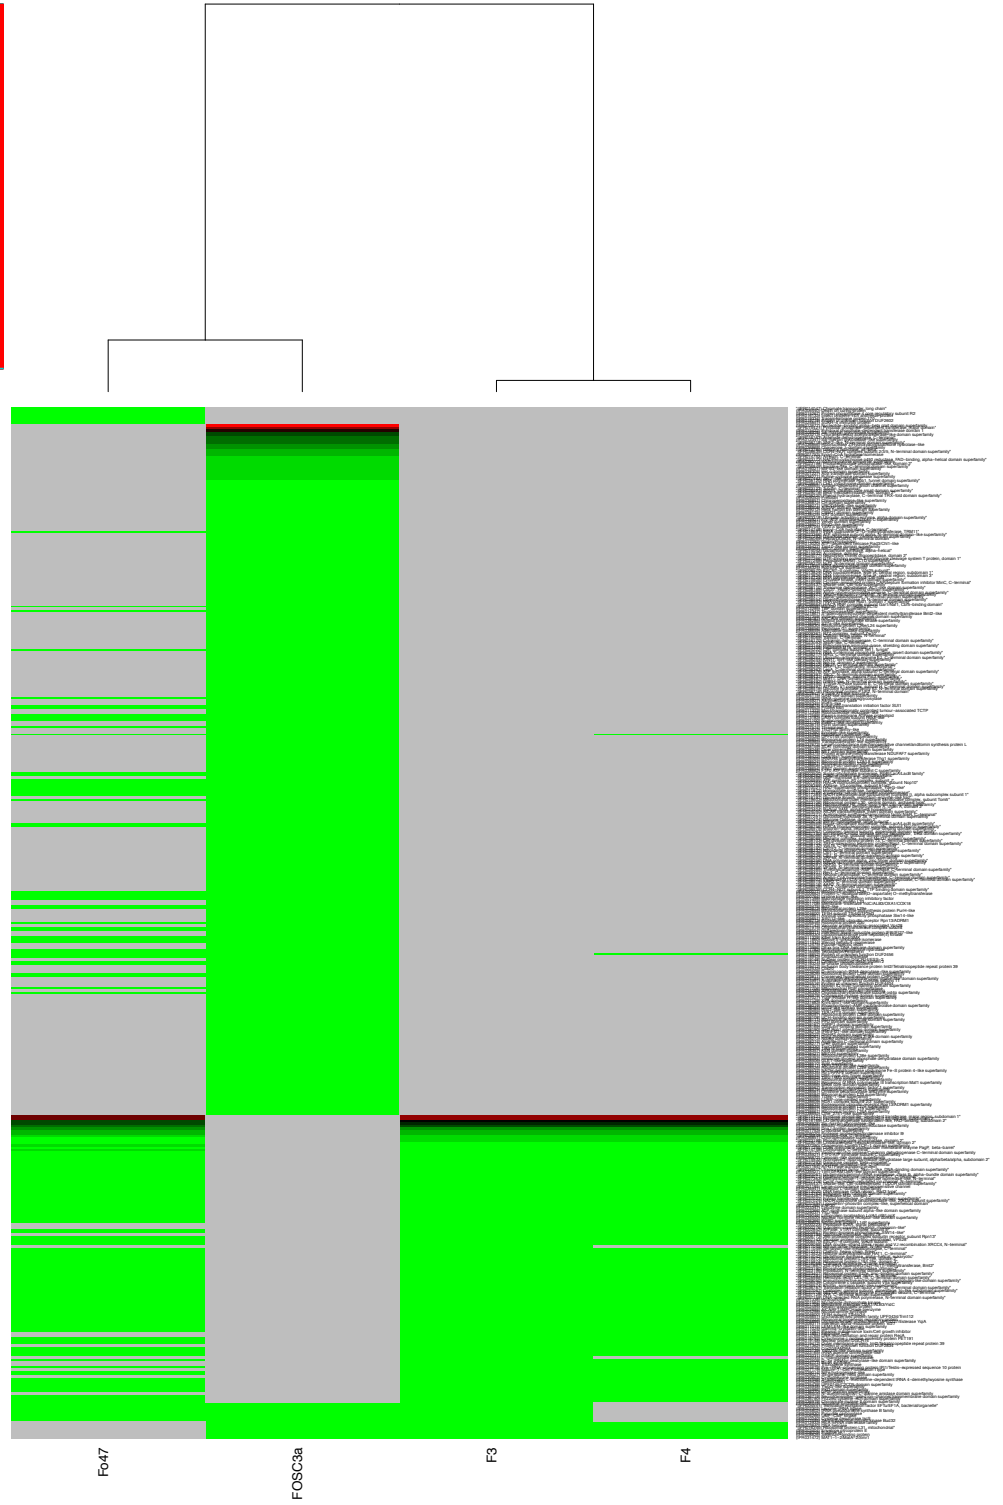

Supplement: mSystems.00345-18-sf002.pdf [file mSystems.00345-18-sf002.pdf]
