# Supplementary material for: Genomic Characterization and Virulence Potential of Two Fusarium oxysporum Isolates Cultured from the International Space Station
Source: PubMed Central journal article supplement (PMC6426649; doi:10.1128/msystems.00345-18), 2019-03-19
Supplement: mSystems.00345-18-sf003.pdf [file mSystems.00345-18-sf003.pdf]

Type Strain # clusters

|       |         |   |          |          |          |          |          |          |          |
|-------|---------|---|----------|----------|----------|----------|----------|----------|----------|
| T1pks | F3      | 7 | C3<br>a  | C23<br>b | C27<br>c | C28<br>d | C38<br>e | C41<br>f | C47<br>g |
|       | F4      | 7 | C19<br>a | C27<br>b | C4<br>c  | C20<br>d | C10<br>e | C5<br>f  | C42<br>g |
|       | Fo47    | 6 | C11<br>a | C21<br>b | C18<br>c | C19<br>d | C23<br>e | C15<br>f |          |
|       | FOSC 3a | 8 | C7<br>a  | C21<br>b | C23<br>c | C22<br>d | C17<br>e | C8<br>f  | C45<br>g |

- a- Fusaric acid (PKS 21)
- b- PKS 5
- c- PKS 7
- d- PKS 28
- e- Bikaverin (PKS 16)
- f- Fusarubin (PKS 3)
- g- Fujikurins (PKS 19)
- h- PKS 2

|      |         |    |          |          |          |          |          |          |          |          |          |          |          |          |
|------|---------|----|----------|----------|----------|----------|----------|----------|----------|----------|----------|----------|----------|----------|
| NRPS | F3      | 12 | C2<br>a  | C8<br>b  | C17<br>c | C19<br>d | C20<br>e | C21<br>f | C30<br>g | C44<br>h | C46<br>i | C14<br>j | C25<br>* | C6<br>*  |
|      | F4      | 11 | C15<br>a | C2<br>b  | C36<br>c | C9<br>d  | C28<br>e | C11<br>f | C46<br>g | C17<br>h | C13<br>i |          | C22<br>* | C40<br>* |
|      | Fo47    | 9  | C26<br>a | C42<br>b | C1<br>c  | C39<br>d | C12<br>e | C24<br>f | C32<br>g | C35<br>h |          |          | C16<br>* |          |
|      | FOSC 3a | 10 | C31<br>a | C41<br>b | C47<br>c | C36<br>d |          | C18<br>f | C34<br>g | C28<br>h |          | C26<br>k | C25<br>* | C11<br>* |

- a- Beauvericin (NRPS 22)
- b- NRPS 39
- c- NRPS 21
- d- NRPS 1
- e- NRPS 2
- f- NRPS 3
- g- NRPS 6
- h- NRPS 4
- i- NRPS 41
- j- NRPS 23
- k- NRPS 5
- \*- no matches

|                |         |   |          |          |
|----------------|---------|---|----------|----------|
| T1PKS<br>-NRPS | F3      | 2 | C4<br>a  | C15<br>b |
|                | F4      | 2 | C18<br>a | C29<br>b |
|                | Fo47    | 2 | C10<br>a | C40<br>b |
|                | FOSC 3a | 2 | C6<br>a  | C40<br>b |

a-Equisetin  
b-Closest match was to Aspyridone, but a very poor match

|                 |         |   |          |
|-----------------|---------|---|----------|
| Indole<br>-NRPS | F3      | 1 | C43<br>a |
|                 | F4      | 1 | C41<br>a |
|                 | Fo47    | 1 | C28<br>a |
|                 | FOSC 3a | 1 | C29<br>a |

a-hexadecahydro-astechrome (HAS)

|              |         |   |
|--------------|---------|---|
| NRPS<br>like | F3      | 9 |
|              | F4      | 9 |
|              | Fo47    | 9 |
|              | FOSC 3a | 7 |

|        |         |   |
|--------|---------|---|
| Indole | F3      | 2 |
|        | F4      | 2 |
|        | Fo47    | 2 |
|        | FOSC 3a | 2 |

|         |         |    |
|---------|---------|----|
| Terpene | F3      | 10 |
|         | F4      | 10 |
|         | Fo47    | 10 |
|         | FOSC 3a | 11 |

|       |         |   |                                                                                           |
|-------|---------|---|-------------------------------------------------------------------------------------------|
| Other | F3      | 4 | Clusters: Indole-T1PKS-NRPS; T3PKS; Terpene-T1PKS; 1 cluster w/o match                    |
|       | F4      | 4 | Clusters: Indole-T1PKS-NRPS; T3PKS; Terpene-T1PKS-NRPS; 1 cluster w/o match               |
|       | Fo47    | 5 | Clusters: Indole-T1PKS-NRPS; T3PKS; Terpene-T1PKS-NRPS; Indole-T1PKS; 1 cluster w/o match |
|       | FOSC 3a | 5 | Clusters: Inole-T1PKS-NRPS; Indole-T1PKS; Terpene-T1PKS-NRPS; 2 clusters w/o match        |
